# Supplementary material for: Designing triphenylamine derivative dyes for highly effective dye-sensitized solar cells with near-infrared light harvesting up to 1100 nm
Source: Royal Society of Chemistry journal article supplement (doi:10.1039/c4ra09444a), 2014-09-15
Supplement: c4ra09444a1.pdf [file c4ra09444a1.pdf]

## Supporting information

### **Designing Triphenylamine Derivative Dyes for Highly Effective Dye-Sensitized**

#### **Solar Cells with Near-Infrared Light Harvesting up to 1100 nm**

Zhenqing Yang<sup>1,2</sup>, Di Wang<sup>1,2</sup>, Xiaohui Bai<sup>1,2</sup>, Changjin Shao<sup>2</sup>, Dapeng Cao<sup>1\*</sup>

<sup>1</sup> State Key Laboratory of Organic-Inorganic Composites, Beijing University of  
Chemical Technology, Beijing 100029, China

<sup>2</sup> College of Science, China University of Petroleum, Beijing, 102249, China

Corresponding Author: [caodp@mail.buct.edu.cn](mailto:caodp@mail.buct.edu.cn)

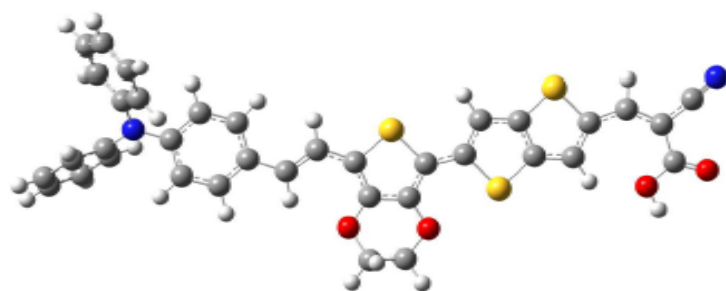

Pi10

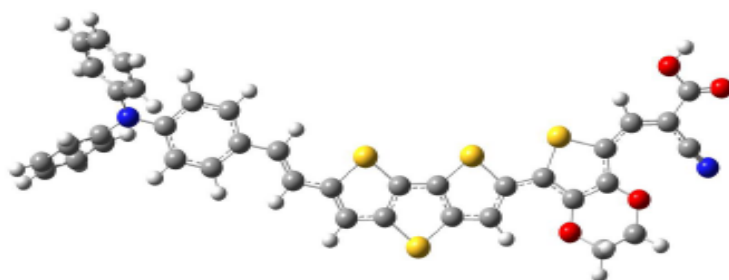

Pi11

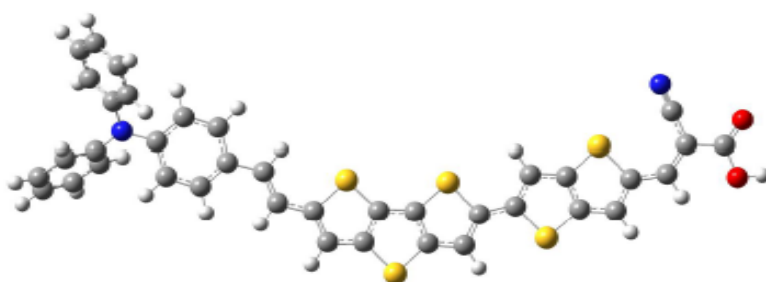

Pi12

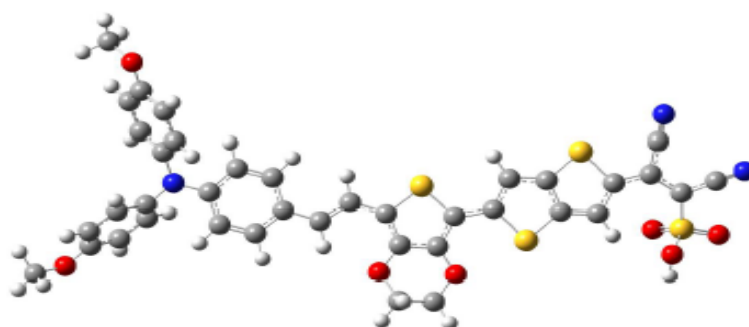

BUCT2

Figure S1. The optimized geometric structures of Pi10-Pi12 and BUCT2 dyes
